# Supplementary material
Source: MDPI journal article supplement (https://www.mdpi.com/1999-4907/11/10/1047)

**Figure S1.** Estimation of population structure using  $LnP(D)$  derived  $\Delta k$  for determining the optimum number of subpopulations. The maximum value of delta  $k$  was found to be at  $k = 2$ .

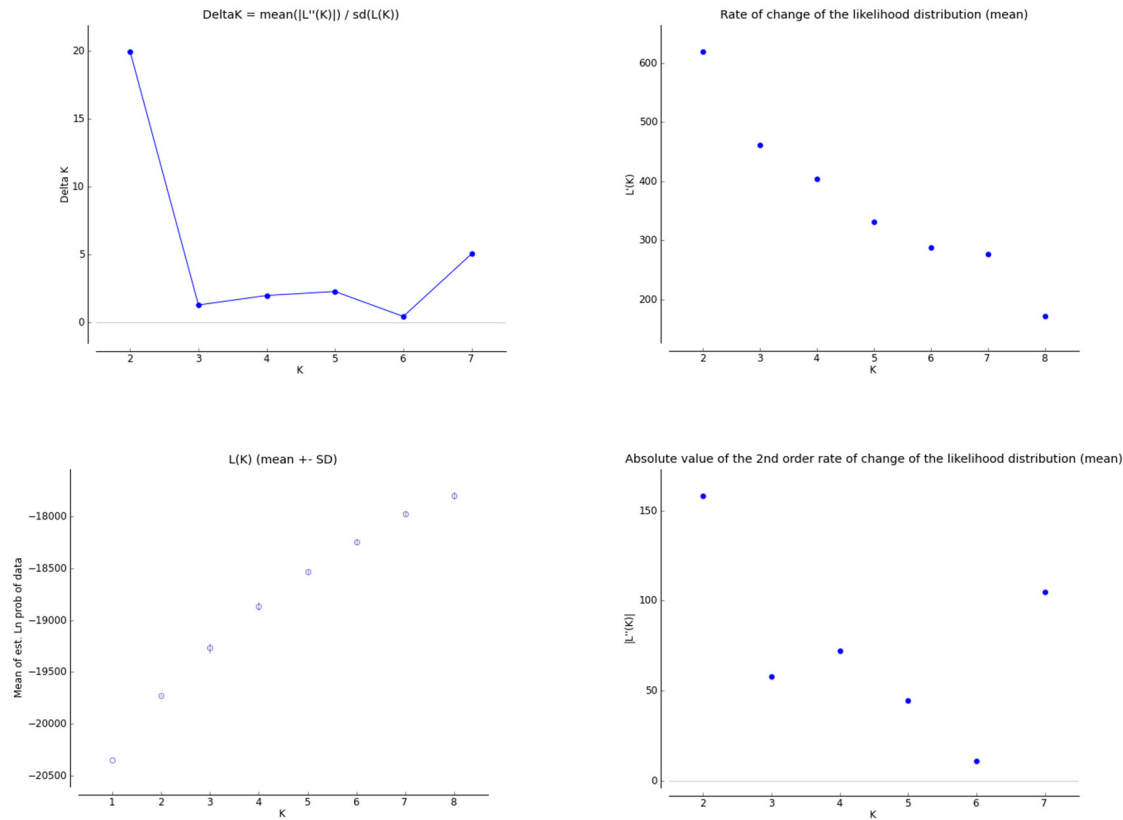

Supplement: s1 [file s1]
